# Supplementary material
Source: MDPI journal article supplement (https://www.mdpi.com/2304-6767/10/10/180)
Supplement: s1 [file s1]

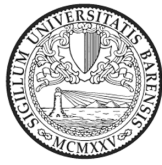

UNIVERSITÀ DEGLI STUDI DI BARI

“ALDO MORO”

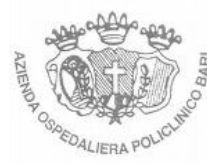

AZIENDA OSPEDALIERO-UNIVERSITARIA CONSORZIALE

POLICLINICO DI BARI

U. O. C. di ODONTOIATRIA

## CARTELLA GNATOLOGICA

CARTELLA N° \_\_\_\_\_ \ \_\_\_\_\_ -CASO N° \_\_\_\_\_ /20 \_\_\_\_\_

Cognome e Nome \_\_\_\_\_ Sesso (M ☐ \ F ☐) Età \_\_\_\_\_ aa

Nato\ a il \_\_\_\_\_ \ \_\_\_\_\_ \ \_\_\_\_\_ a \_\_\_\_\_ prov (\_\_\_\_)

Residente a \_\_\_\_\_ in via\piazza \_\_\_\_\_

Prov (\_\_\_\_) Nazione \_\_\_\_\_ cap \_\_\_\_\_ tel \_\_\_\_\_

Stato civile \_\_\_\_\_ Figli \_\_\_\_\_

Professione \_\_\_\_\_

DIAGNOSI \_\_\_\_\_

DATA INIZIO CURA \_\_\_\_\_ \ \_\_\_\_\_ \ \_\_\_\_\_ DATA FINE CURA \_\_\_\_\_ \ \_\_\_\_\_ \ \_\_\_\_\_

MOTIVAZIONE (riportare testualmente le parole dette dal paziente):

.....  
.....  
.....

## ANAMNESI PATOLOGICA REMOTA GENERALE

- ☐ Infezioni in atto: .....
- ☐ Infezioni pregresse: .....
- ☐ Ipertensione: .....
- ☐ Cardiopatie: .....
- ☐ Malattie vascolari: .....
- ☐ Emopatie: .....
- ☐ Allergie: .....
- ☐ Immunopatie: .....
- ☐ Malattie reumatiche: .....
- ☐ Malattie del collagene: .....
- ☐ Malattie dermatologiche: .....
- ☐ Malattie ortopediche: .....
- ☐ Malattie neurologiche: .....
- ☐ Vertigini: .....
- ☐ Malattie ORL: .....
- ☐ Malattie oculari: .....
- ☐ Apparato G. I.: .....
- ☐ Apparato urologico: .....
- ☐ Sistema endocrino: .....
- ☐ Interventi chirurgici: .....
- ☐ Incidenti e traumi: .....
- ☐ Ansia\depressione: .....
- ☐ Fumo \ alcool \ droghe.
- ☐ Altro:  
.....  
.....

## ANAMNESI FARMACOLOGICA

.....

.....

.....

.....

.....

.....

.....

## ANAMNESI PATOLOGICA REMOTA SPECIALISTICA

HA SUBITO:

- ☐ TERAPIE ODONTOIATRICHE:.....
- ☐ TERAPIE ORTODONTICHE:.....
- ☐ TERAPIE PROTESICHE:.....
- ☐ CHIRURGIA ODONTOIATRICA:.....

IN PASSATO E' STATO GIA'

- ☐ VISITATO PER QUESTO PROBLEMA? .....
- ☐ TRATTATO PER QUESTO PROBLEMA? (specificare tipi di apparecchiatura o farmaci utilizzati: .....  
.....)

## ANAMNESI PATOLOGICA PROSSIMA

- ☐ CEFALEA
- ☐ AFFATICAMENTO MUSCOLARE
- ☐ DISTURBI Uditivi
- ☐ DOLORE IN FASE DI APERURA BUCCALE
- ☐ RUMORE IN FASE DI APERTURA BUCCALE:
  - ☐ CLICK    ☐ CLICK RECIPROCO    ☐ SCHIOCCO    ☐ CREPITIO
- ☐ DIFFICOLTA' A MASTICARE
- ☐ DOLORE DURANTE LA MASTICAZIONE
- ☐ RUMORI DURANTE LA MASTICAZIONE
- ☐ DIFFICOLTA' ALLA DEGLUTIZIONE

|             | INSORGENZA |    |       |        |        |           |
|-------------|------------|----|-------|--------|--------|-----------|
|             | NO         | SI | NOTTE | GIORNO | RIPOSO | ATTIVITA' |
| CERVICALGIA |            |    |       |        |        |           |
| BRACHIALGIA |            |    |       |        |        |           |
| DORSALGIA   |            |    |       |        |        |           |
| LOMBALGIA   |            |    |       |        |        |           |
| SCIATALGIA  |            |    |       |        |        |           |
| PARESTESIA  |            |    |       |        |        |           |

DA QUANDO (il sintomo più insopportabile):

|            |         |         |         |            |
|------------|---------|---------|---------|------------|
| <15 giorni | <3 mesi | >3 mesi | >6 mesi | _____ anni |
|------------|---------|---------|---------|------------|

LOCALIZZAZIONE REGIONALE

|          | INSORGENZA |    |     |       |        |        |           |
|----------|------------|----|-----|-------|--------|--------|-----------|
|          | DX         | SX | BIL | NOTTE | GIORNO | RIPOSO | ATTIVITA' |
| TESTA    |            |    |     |       |        |        |           |
| COLLO    |            |    |     |       |        |        |           |
| FACCIA   |            |    |     |       |        |        |           |
| ORECCHIO |            |    |     |       |        |        |           |
| FRONTE   |            |    |     |       |        |        |           |
| NASO     |            |    |     |       |        |        |           |
| OCCHIO   |            |    |     |       |        |        |           |

| DISTRETTO CEFALICO |          |            |            |           |
|--------------------|----------|------------|------------|-----------|
| CEFALEA            |          |            |            | EMICRANIA |
| TEMPORALE          | FRONTALE | AL VERTICE | OCCIPITALE |           |

TIPO (del sintomo più insopportabile):    ☐ Acuto    ☐ Gravativo    ☐ Costrittivo

LIVELLO DEL DOLORE (VAS)

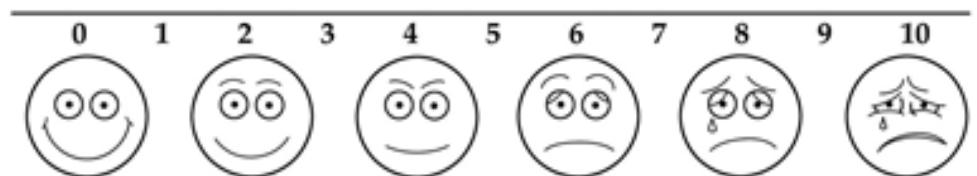

- FREQUENZA:

☐ GIORNALIERA    ☐ SETTIMANALE    ☐ >1 SETTIMANA    ☐ MENSILE

- DURATA:

☐ COSTANTE    ☐ SPORADICA    ☐ INTERMITTENTE

- CAUSE CHE MODIFICANO IL DOLORE:

☐ IN PIEDI    ☐ CAMMINANDO    ☐ SUPINO    ☐ MANGIANDO    ☐ ALTRO

.....

QUANTO IL SUO PROBLEMA INTERFERISCE SULLA SUA VITA QUOTIDIANA?

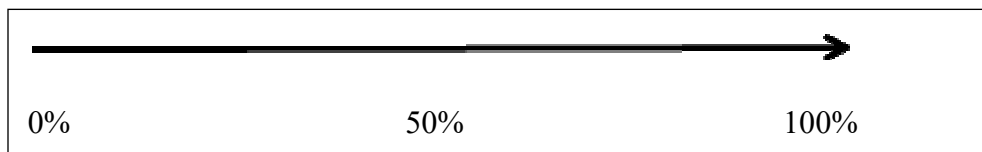

Qual è la sua opinione personale riguardo ai motivi che scatenano il dolore?

.....  
.....

Ci sono elementi che disturbano il sonno?

.....  
.....

Che cosa si aspetta dal trattamento?

.....  
.....

Ci sono altri dati che non le sono stati richiesti e che ritiene importanti?

.....  
.....

### ESAME OBIETTIVO EXTRAORALE

| TIPO FACCIALE |                |                |
|---------------|----------------|----------------|
| MESIOFACCIALE | DOLICOFACCIALE | BRACHIFACCIALE |

| PROFILO DEI TESSUTI MOLLI |          |         |
|---------------------------|----------|---------|
| NORMALE                   | CONVESSO | CONCAVO |

| ASIMMETRIE FACCIALI MACROSCOPICHE |             |               |
|-----------------------------------|-------------|---------------|
| ASSENTE                           | DEV. DESTRA | DEV. SINISTRA |

| LABBRA     |              |
|------------|--------------|
| COMPETENTI | INCOMPETENTI |

| CICATRICI              |         |
|------------------------|---------|
| PRESENTI<br>sede _____ | ASSENTI |

## ESAME OBIETTIVO INTRAORALE

| TESSUTI MOLLI                      |                      |
|------------------------------------|----------------------|
| IRREGOLARITA' DEI MARGINI LINGUALI | LINEA ALBA OCCLUSALE |

| MOLARI                |    |    |
|-----------------------|----|----|
| 1 <sup>a</sup> CLASSE | Dx | Sx |
| 2 <sup>a</sup> CLASSE | Dx | Sx |
| 3 <sup>a</sup> CLASSE | Dx | Sx |

| CANINI    |    |    |
|-----------|----|----|
| 1a CLASSE | Dx | Sx |
| 2a CLASSE | Dx | Sx |
| 3a CLASSE | Dx | Sx |

| INCISIVI                 |                          |
|--------------------------|--------------------------|
| 1 <sup>a</sup> DIVISIONE | 2 <sup>a</sup> DIVISIONE |

OVERBITE: \_\_\_\_\_ mm

OVERJET \_\_\_\_\_ mm

| CURVA DI SPEE |        |          |         |
|---------------|--------|----------|---------|
| NORMALE       | PIATTA | PROFONDA | INVERSA |

| STATO PARODONTALE |               |
|-------------------|---------------|
| BUONO             | INSUFFICIENTE |

|                      | DX | SX | BIL | TOT | PAR |
|----------------------|----|----|-----|-----|-----|
| OPEN LATERALE        |    |    |     |     |     |
| CROSS BITE           |    |    |     |     |     |
| BRODIE               |    |    |     |     |     |
| ESTRAZIONI           |    |    |     |     |     |
| MIGRAZIONI           |    |    |     |     |     |
| INCLINAZIONI         |    |    |     |     |     |
| ROTAZIONI            |    |    |     |     |     |
| AGENESIE             |    |    |     |     |     |
| SOPRANNUMERARI       |    |    |     |     |     |
| INCLUSIONI           |    |    |     |     |     |
| CARIE                |    |    |     |     |     |
| FACCETTE DI<br>USURA |    |    |     |     |     |
| OTTURAZIONI          |    |    |     |     |     |
| PROTESI FISSA        |    |    |     |     |     |
| PROTESI MOBILE       |    |    |     |     |     |
| AFFOLLAMENTO         |    |    |     |     |     |
| DIASTEMI             |    |    |     |     |     |

CONTATTO DENTALE ANTERIORE IN C. O.

|               |  |
|---------------|--|
| TESSUTALE     |  |
| 1/3 CERVICALE |  |
| 1/3 MEDIO     |  |
| 1/3 INCISALE  |  |
| CROSS BITE    |  |

TIPO DI OCCLUSIONE

|                             |    |    |    |
|-----------------------------|----|----|----|
| MUTUALMENTE PROTETTA        |    |    |    |
| CONTATTO PIUMA DEI FRONTALI |    |    |    |
|                             | PT | LD | LS |
| IPERBILANCIATA              |    |    |    |
| BILATERALMENTE BILANCIATA   |    |    |    |
| FUNZIONE DI GRUPPO          |    |    |    |
| DISCLUSIONE DI GRUPPO       |    |    |    |
| DISCLUSIONE FRONTALE        |    |    |    |

| LOCALIZZAZIONE DI CONTATTI PREMATURI |    |   |   |   |   |    |   |
|--------------------------------------|----|---|---|---|---|----|---|
| M                                    | PM | C | I | I | C | PM | M |
| M                                    | PM | C | I | I | C | PM | M |

## ESAME FUNZIONALE CLINICO

| ISPEZIONE GENERALE (POSTURA) |             |       |
|------------------------------|-------------|-------|
| DEBOLE                       | SUFFICIENTE | BUONA |

|                                        |       |            |             |
|----------------------------------------|-------|------------|-------------|
| POSIZIONE DI RIPOSO<br>DURANTE L'ESAME | CAPO  | SIMMETRICA | ASIMMETRICA |
|                                        | CORPO | SIMMETRICA | ASIMMETRICA |



|                    | ATTIVI |  | DOLORE |    | PASSIVI | DOLORE |    | ENDFEEL  |          |
|--------------------|--------|--|--------|----|---------|--------|----|----------|----------|
|                    | mm     |  | DX     | SX | mm      | DX     | SX | positivo | negativo |
| APERTURA MASSIMA   |        |  |        |    |         |        |    |          |          |
| LATEROTRUSIONE SX  |        |  |        |    |         |        |    |          |          |
| LATEROTRUSION DX   |        |  |        |    |         |        |    |          |          |
| PROTRUSIONE DEVIAS |        |  |        |    |         |        |    |          |          |
| RETRUSIONE         |        |  |        |    |         |        |    |          |          |

## DEVIAZIONE DEL TRAGITTO DI APERTURA E CHIUSURA

(far compiere al paziente la massima apertura possibile)

|                                    |  |    |                     |
|------------------------------------|--|----|---------------------|
|                                    |  |    | a quanti mm avviene |
| APERTURA                           |  | Sx | Mm                  |
| CHIUSURA                           |  | Sx | Mm                  |
| RITORNO IN ASSE DURANTE L'APERTURA |  |    | SI                  |

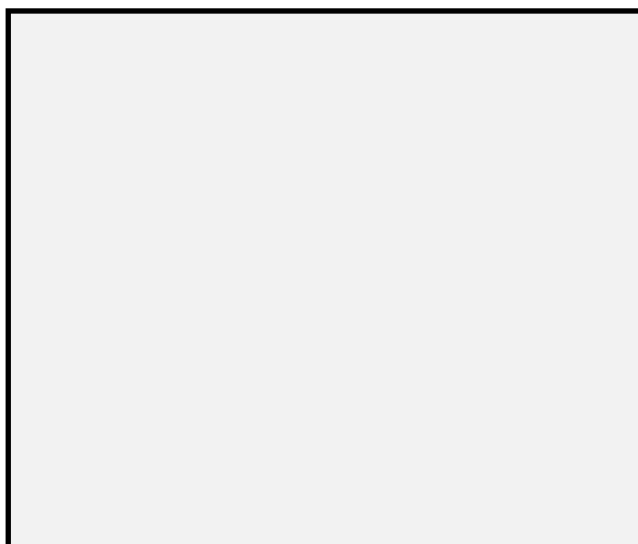

## CLICKING

|                                     |  |    |    |            |    |    |
|-------------------------------------|--|----|----|------------|----|----|
| APERTURA                            |  | Dx | Sx | CHIUSURA   | Dx | Sx |
| INIZIO                              |  |    |    | FINE       |    |    |
| INTERMEDIO                          |  |    |    | INTERMEDIO |    |    |
| FINE                                |  |    |    | INIZIO     |    |    |
| SCOMPARSA CON MANOVRA IN PROTRUSIVA |  |    |    |            |    |    |
| CREPITIO                            |  |    |    |            |    |    |
| LOCKING                             |  |    |    |            |    |    |

| PARAFUNZIONI |               |                        |
|--------------|---------------|------------------------|
| SERRAMENTO   | DIGRIGNAMENTO | MORDERE ALTRO<br>----- |

| ABITUDINI VIZIATE           |                           |                         |            |                       |
|-----------------------------|---------------------------|-------------------------|------------|-----------------------|
| SUCCHIAMENTO<br>DEL POLLICE | INTERPOSIZIONE<br>LABIALE | DEGLUTIZIONE<br>ATIPICA | ONICOFAGIA | RESPIRAZIONE<br>ORALE |

**PALPAZIONE MUSCOLARE** (tensione e dolorabilità)

| DX |  |  | TRIGGER<br>POINT |                                               | SX |  |  | TRIGGER<br>POINT |
|----|--|--|------------------|-----------------------------------------------|----|--|--|------------------|
|    |  |  |                  | TEMPORALE ANTERIORE                           |    |  |  |                  |
|    |  |  |                  | TEMPORALE MEDIO                               |    |  |  |                  |
|    |  |  |                  | TEMPORALE POSTERIORE                          |    |  |  |                  |
|    |  |  |                  | STERNOCLEIDOMASTOIDEO CAPO<br>STERNALE        |    |  |  |                  |
|    |  |  |                  | STERNOCLEIDOMASTOIDEO CAPO<br>CLAVICOLARE     |    |  |  |                  |
|    |  |  |                  | DIGATRICO VENTRE POSTERIORE                   |    |  |  |                  |
|    |  |  |                  | DIGASTRICO VENTRE ANTERIORE                   |    |  |  |                  |
|    |  |  |                  | BASE DEL CRANIO/PARTE<br>POSTERIORE DEL COLLO |    |  |  |                  |
|    |  |  |                  | TRAPEZIO SUPERIORE                            |    |  |  |                  |
|    |  |  |                  | TRAPEZIO INFERIORE                            |    |  |  |                  |
|    |  |  |                  | MASSETERE SUPERFICIALE                        |    |  |  |                  |
|    |  |  |                  | MASSETERE PROFONDO                            |    |  |  |                  |
|    |  |  |                  | TEMPORALIS TENDON                             |    |  |  |                  |
|    |  |  |                  | PTERIGOIDEO ESTERNO CAPO SUP                  |    |  |  |                  |
|    |  |  |                  | PTERIGOIDEO ESTERNO CAPO INF                  |    |  |  |                  |

**ESAMI RICHIESTI**

|                                      | DATA              | DIAGNOSI |
|--------------------------------------|-------------------|----------|
| RX OPT                               | ___ \ ___ \ _____ |          |
| STRATIGRAFIA ATM                     | ___ \ ___ \ _____ |          |
| TELERADIOGRAFIA<br>LATERO-LATERALE   | ___ \ ___ \ _____ |          |
| TELERADIOGRAFIA<br>POSTERO-ANTERIORE | ___ \ ___ \ _____ |          |
| TELERADIOGRAFIA<br>ASSIALE           | ___ \ ___ \ _____ |          |
| RMN ATM                              | ___ \ ___ \ _____ |          |
| ARCO FACCIALE                        | ___ \ ___ \ _____ |          |
| KINESIOGRAFIA                        | ___ \ ___ \ _____ |          |
| AXIOGRAFIA                           | ___ \ ___ \ _____ |          |
| ELETTROMIOGRAFIA                     | ___ \ ___ \ _____ |          |
| CEFALOMETRIA L-L                     | ___ \ ___ \ _____ |          |
| CEFALOMETRIA P-A                     | ___ \ ___ \ _____ |          |
| CEFALOMETRIA<br>ASSIALE              | ___ \ ___ \ _____ |          |

**CONSULENZE**

|              | DATA              | DIAGNOSI |
|--------------|-------------------|----------|
| CHIRURGICA   | ___ \ ___ \ _____ |          |
| PROTESICA    | ___ \ ___ \ _____ |          |
| OCULISTICA   | ___ \ ___ \ _____ |          |
| ORL          | ___ \ ___ \ _____ |          |
| NEUROLOGICA  | ___ \ ___ \ _____ |          |
| FISIATRICA   | ___ \ ___ \ _____ |          |
| PSICHIATRICA | ___ \ ___ \ _____ |          |

## DIAGNOSI

- ☐ ALTERAZIONI DI ORIGINE MUSCOLARE.....
- ☐ IPOMOBILITA'.....
- ☐ IPERMOBILITA' CONDILARE.....
- ☐ DISLOCAZIONE DEL DISCO:   ☐ INIZIALE  
                                                 ☐ INTERMEDIA  
                                                 ☐ FINALE
- ☐ ASIMMETRICA MORFOLOGICA.....
- ☐ ASIMMETRIA FUNZIONALE.....
- ☐ LOCKING.....
- ☐ ARTROSI ATM.....
- ☐ ALTRO.....  
.....

## ANNOTAZIONI

.....  
.....  
.....  
.....  
.....  
.....

## TERAPIA CONSIGLIATA

### FARMACOLOGICA

.....  
.....  
.....  
.....  
.....  
.....

### CON PLACCA

.....  
.....  
.....  
.....  
.....  
.....

### OCCLUSALE

.....  
.....  
.....  
.....  
.....

## DIARIO

[illegible]
